# Supplementary material for: Structure of the Mating-Type Genes and Mating Systems of Verpa bohemica and Verpa conica (Ascomycota, Pezizomycotina)
Source: MDPI journal article supplement (doi:10.3390/jof9121202), 2023-12-15

Consensus

- 1. MAT1-1-10 *Verpa bohemica* strain No. 20020 Gene05695
- 2. MAT1-1-10 *Verpa bohemica* strain No. 20124 Gene05694
- 3. MAT1-1-10 *Verpa bohemica* strain No. 21108 Gene05692
- 4. MAT1-1-10 *Verpa conica* strain No. 21110 Gene05312
- 5. MAT1-1-10 *Morchella sp. Mes-20* NC AV161143
- 6. MAT1-1-10 *Morchella rufobrunnea* NC QQL94651

|   |                                                                                   |    |
|---|-----------------------------------------------------------------------------------|----|
|   |  |    |
|   | M×E×YL×YHDNR-RDD×RRE×LLRLGHALIKVKNDLAFFPSTRLD××IRKVLVFCIATLKEFEVK×L×××FLD××QD×YP  |    |
| 1 | MTE-YLAYHDNR-RDDPRRESLLRLGHALIKVKNDLAFFPSTRLDPNIRKVLVFCIATLKEFEVKKLNLKFLDKVQDVYP  | 78 |
| 2 | MTE-YLAYHDNR-RDDPRRESLLRLGHALIKVKNDLAFFPSTRLDPNIRKVLVFCIATLKEFEVKKLNLKFLDKVQDVYP  | 78 |
| 3 | MTE-YLAYHDNR-RDDPRRESLLRLGHALIKVKNDLAFFPSTRLDPNIRKVLVFCIATLKEFEVKKLNLKFLDKVQDVYP  | 78 |
| 4 | MAEAYLVCHDNR-RDDSRREALLRLGHALIKVKNDLAFFPSKRLDSQIRDLVLVFCIAILKEFEVKTLRQEFLEGGQDIYP | 79 |
| 5 | MPQPYLSYKDHFILNDQRREAILRLGRVLIQTKNDLTFFPRTPYFSKIRKAIIFCTDTLKEFKIKNLHPALLDRHKDIYP  | 80 |
| 6 | MPQTYLSYKDHFILNNERREAVLRLGRILIQTKNELAFFPRTPYNSKIRRVMIFCTETLKEFKIKNLHPALLDRRKDIYP  | 80 |

|   |                                                                                    |     |
|---|------------------------------------------------------------------------------------|-----|
|   |   |     |
|   | LANLYNLGIQI×AL×EIQ××L×T×L×QWK×DV×AVQ×SFP×GS×DIG×VLA×VHEFLVF×TLTNRIHPFHTLTE×SIK×A   |     |
| 1 | LANLYNLGIQIMALLEIQDVLTYQLCQWKQDVGVAVQASFPDGS-DIGIVLADVHEFLVFSTLTNRHPFHTLTTESSIKRA  | 157 |
| 2 | LANLYNLGIQIMALLEIQDVLTYQLCQWKQDVGVAVQASFPDGS-DIGIVLADVHEFLVFSTLTNRHPFHTLTTESSIKRA  | 157 |
| 3 | LANLYNLGIQIMALLEIQNVLYTYQLCQWKQDVGVVQTSFPDGS-DIGIVLADVHEFLVFSTLTNRHPFHTLTTESSIKRA  | 157 |
| 4 | LANLYNLGIQILALQEIQRFFTELDQWKYDVEAVQASSPGGSDDIGTVLAEVHEFLVFATLTNRHPFHILTEFSIKHA     | 159 |
| 5 | LANLYNLGVQILALREVNIIRLERDIEKWNCGKTLQGSPLPEDCDVRLILVEVHEFLAFATIANQIHFPHTLTPYSIRCA   | 160 |
| 6 | LTHLYNLGVQILALREVNIIRLERDIKRWNCRLKALQDSFPENSSDVGVLVAEVHEFLVFATIANQVHTSHTLTYYISIRLA | 160 |

|   |                                                                                   |     |
|---|-----------------------------------------------------------------------------------|-----|
|   |  |     |
|   | VQ×AKHSEFL×ASHT×SIL×AAFSIQ××L××××TS×TK××YVVSDAV×L××T×I×IA×DWYK××××S×S××EK×××××    |     |
| 1 | VQIAKHSEFLADASHSVSILQAAFSIQSGLEALGTSNTKDKYVVSDAVTLSTTTIFIARDWYKNHELSSMSAEK×××××   | 231 |
| 2 | VQIAKHSEFLADASHSVSILQAAFSIQSGLEALGTSNTKDKYVVSDAVTLSTTTIFIARDWYKNHELSSMSAEK×××××   | 231 |
| 3 | VQIAKHSEFLADASHTVSILQAAFSIQSGLEALGASNTKDKYVVSDAVTLSTTTIFIARDWYKNHELSSMSAEK×××××   | 231 |
| 4 | VQVAKHSEFLTEASNTISILAAALSIGNELDS--ASGPKNNRVSSAIIPPQTVIHIADWYKSYKSSISVAEKACCHSN    | 237 |
| 5 | AKAAQNSRLLTEAAHTLSILRAAFSIQNELQIRRTSKTTRSRIISNAVSLPKVALNICSDWYNRYGSHA×××××××      | 229 |
| 6 | AEAAKGSIFTTEATHTISILRAAFVQNEIQIRTL-MRRNYIISDPVSLPQIVLTLCSDWYNHRKDHAS×××××××       | 229 |

|   |                                                                                     |     |
|---|-------------------------------------------------------------------------------------|-----|
|   |  |     |
|   | ×××××IRQEA×LP×IPF××L×TWFINARRRI××GQTI×P×LK××V×××××S×K×P××××××-×××PMD×××××           |     |
| 1 | ×××××IRQEARLPVIPFDHLLTWFINARRRILVAGQTISPALKVVVHNLITSDKKPPP×××××SYVPMDDSNY           | 295 |
| 2 | ×××××IRQEARLPVIPFDHLLTWFINARRRILVAGQTISPALKVVVHNLITSDKKPPP×××××SYVPMDDSNY           | 295 |
| 3 | ×××××IRQEARLPVIPFDHLLTWFINARRRILVAGQTISPALKVVVHNLITSDKKPPP×××××SHVPMDDSNY           | 295 |
| 4 | KFHVKTANYQEFRREAQLPMIPFNRLFTWFIN××××××××××××××××××××××××××××××××××××××××××          | 294 |
| 5 | ×××××LYTKIRRNEISTPIPFEKLVTFWFTNARRRIKHNQAIRPGLKAIIVDEALSS-KRSFKTDIH-IQTRGSNGDD      | 299 |
| 6 | ×××××RIFNDFHQNDKSTQIPFENLMTWFCNGRRRIITCGQTINFDLKAIIDGAVSS-KIPSKIETRGDDTDGNDGDG      | 301 |

|   |                                                                                     |     |
|---|-------------------------------------------------------------------------------------|-----|
|   |  |     |
|   | E×HY×IPLT×LIAEFLDELGE×PK×LLPLKHL×VDPPLP×SRSPI×F×FLV×××AD××TQ××Q×LL××IY×LFN×××××C    |     |
| 1 | EFHYNIPLTQLIAEFLDELGEVPSKLLPLKHLAVDPPLPESRSPISFDFLVDLEADRSTQIAQSLLQKIYRLFNTTIYRC    | 375 |
| 2 | EFHYNIPLTQLIAEFLDELGEVPSKLLPLKHLAVDPPLPESRSPISFDFLVDLEADRSTQIAQSLLQKIYRLFNTTIYRC    | 375 |
| 3 | EFHYNIPLTQLIAEFLDELGEVPSKLLPLKHLAVDPPLPESRSPISFDFLVNTEAD×××××××××××××××××××         | 351 |
| 4 | EPHYDIPLTELILELLGELGEMPKLIL-LKHSTVDPPLPRNRSPIFFNLFVNMGADGVQTETQNLKKIYNLFNMTAYRC     | 373 |
| 5 | DPEWEIPLSRMIAEFLDELGDAPHELDPPSNLVIN--NFGSGPPIPLPTLLVDNNMDKVTQGCQQLKSIYSLFNEISCAC    | 377 |
| 6 | EPEWEIPLSRMIAEFLDELGDAPHELDSPSHPITN--ISSRDIPLV--FPVNNSMDKFAQGCQYLLKSIYNLFNEVSSAC    | 377 |

|   |                                                                                     |     |
|---|-------------------------------------------------------------------------------------|-----|
|   |  |     |
|   | L×××Q×AHLW×××××Y×Y×××A×××××N×LRA×G×ALATRRLN××YF×E××VC×××L××××N×NP×RSDLLEAVFEICN     |     |
| 1 | LQVTQGAHLWSMREQYEVAVRATREIEKNYLRAVGTALATRRLNPAYFGEKIVCNRLGAPTNNNPIRSDLLEAVFEICN     | 455 |
| 2 | LQVTQGAHLWSMREQYEVAVRATREIEKNYLRAVGTALATRRLNPAYFGEKIVCNRLGAPTNNNPIRSDLLEAVFEICN     | 455 |
| 3 | ×××××××××××××××××××××××××××××××××××××××××××××××××××××××××××××××××××××××××           | 400 |
| 4 | LEVIQRAHWVNMEKQYEVAVRAKKEIDKNYLRAAGIALATRRLNTVHFEEIIVCRKSLVEQNNRNPFLKVLDAVFEICN     | 453 |
| 5 | LDIFQRAYWLDERNRYSYTLGAKRDMYDNCRAISVLLGTRESNETYFEWQ×××××××××××××××××××××××           | 444 |
| 6 | LDILQRAHWLDAKNKQYHTSKAKIDMDRSLCRAINVLATKKPKNTYLECQ×××××××××××××××××××××××           | 444 |

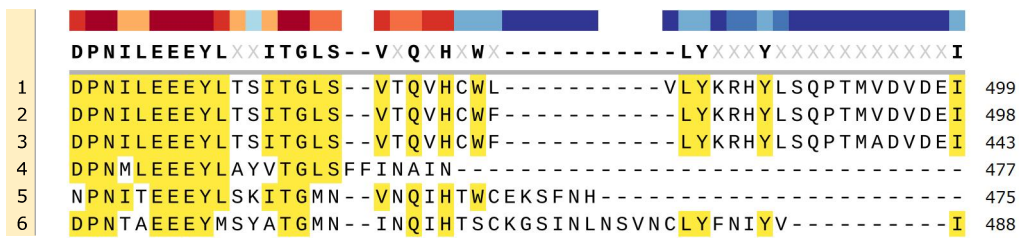

Supplement: s1 [file s1]
