# Supplementary material for: Structure of the Mating-Type Genes and Mating Systems of Verpa bohemica and Verpa conica (Ascomycota, Pezizomycotina)
Source: MDPI journal article supplement (doi:10.3390/jof9121202), 2023-12-15
Supplement: s1 [file s1]

The detailed sequence information of the *MAT1-1-10* protein motif.

Motif 1

| Name ?                              | Start ? | p-value ? | Sites ?                                                                                                           |
|-------------------------------------|---------|-----------|-------------------------------------------------------------------------------------------------------------------|
| Morchella_purpurascens_[QQL94643.1] | 48      | 1.27e-60  | FFPRTYPNPK <b>IR</b> KVMVFCIAT <b>LKEFKIKNLHPALLDQ</b> <b>KD</b> IYPLANLYNLGVQ <b>IILALREV</b> NIRLEKDI <b>IK</b> |
| Morchella_importuna_[AVI60817.1]    | 48      | 1.42e-58  | FFPRTAYNLK <b>IR</b> KAMVFCIAT <b>LKEFKIKNLHPALLDQ</b> <b>KD</b> ICPLANLYNLGVQ <b>IILALREV</b> NIRLEKDI <b>IK</b> |
| Morchella_sextelata_[QQL94615.1]    | 48      | 3.25e-58  | FFPRTYPNPK <b>IR</b> KAMVFCIA <b>LKEFKIKNLHPALLDQ</b> <b>KD</b> IYPLANLYNLGVQ <b>IILALREV</b> NIRLEKDI <b>IK</b>  |
| Morchella_sp._Mes-20_[AVI61143.1]   | 48      | 1.75e-57  | FFPRTPYSPK <b>IR</b> KAI <b>IFCTDTLKEFKIKNLHPALLDR</b> <b>KD</b> IYPLANLYNLGVQ <b>IILALREV</b> NIRLERDIEK         |
| Morchella_sp._Mes-19_[QQL94629.1]   | 48      | 8.09e-56  | FFPRTPYSPK <b>IR</b> KAI <b>IFCTDTLKEFKIKNLHPALLDR</b> <b>KD</b> IYPLANLYNLGVQ <b>IILALREV</b> NIRLERDIEK         |
| Morchella_crassipes_[AVI60838.1]    | 48      | 8.09e-56  | FFPRTPYSPK <b>IR</b> KAI <b>IFCTDTLKEFKIKNLHPALLDR</b> <b>KD</b> IYPLANLYNLGVQ <b>IILALREV</b> NIRLERDIEK         |
| Morchella_sp._Mes-6_[QQL94636.1]    | 48      | 4.76e-55  | FFPRTPYSPK <b>IR</b> KAI <b>IFCTDTLKEFKIKNLHPALLDR</b> <b>KD</b> IYPLANLYNLGVQ <b>IILALREV</b> NIRLERDIEK         |
| Morchella_rufobrunnea_[QQL94651.1]  | 48      | 2.94e-53  | FFPRTPYNSK <b>IR</b> RVMI <b>FCTETLKEFKIKNLHPALLDR</b> <b>KD</b> IYPLANLYNLGVQ <b>IILALREV</b> NIRLERDIKR         |
| V_bohemica_No._21108                | 46      | 1.76e-50  | FFPSTRLDPN <b>IR</b> KVLVFCIAT <b>LKEFEVKKLNKFLDKVQ</b> <b>DV</b> YPLANLYNLGIQ <b>IMALLEI</b> QNVLYTQLCQ          |
| V_bohemica_No._21124                | 46      | 1.76e-50  | FFPSTRLDPN <b>IR</b> KVLVFCIAT <b>LKEFEVKKLNKFLDKVQ</b> <b>DV</b> YPLANLYNLGIQ <b>IMALLEI</b> QDVLYTQLCQ          |
| V_bohemica_No._20020                | 46      | 1.76e-50  | FFPSTRLDPN <b>IR</b> KVLVFCIAT <b>LKEFEVKKLNKFLDKVQ</b> <b>DV</b> YPLANLYNLGIQ <b>IMALLEI</b> QDVLYTQLCQ          |
| V_conica_No._21110                  | 47      | 2.92e-45  | FFPSKRLDSQ <b>IR</b> DVLVFCIA <b>LKEFEVKTLRQ</b> <b>EFLDEGQD</b> IYPLANLYNLGIQ <b>ILALQEI</b> QNRFFTELDQ          |

Motif 2

| Name ?                              | Start ? | p-value ? | Sites ?                                                                                                                             |
|-------------------------------------|---------|-----------|-------------------------------------------------------------------------------------------------------------------------------------|
| Morchella_crassipes_[AVI60838.1]    | 118     | 3.16e-59  | WNCGLKTLQS <b>SL</b> PEDSCDVGLILVEV <b>HEFLVFATIANQ</b> <b>IMP</b> FHTLT <b>PYSIRCAAKAAQNS</b> RLLTEAAHTL                           |
| Morchella_sp._Mes-6_[QQL94636.1]    | 118     | 3.16e-59  | WNCGLKTLQG <b>SL</b> PEDSCDVGLILVEV <b>HEFLVFATIANQ</b> <b>IMP</b> FHTLT <b>PYSIRCAAKAAQNS</b> RLLTEAAHTI                           |
| Morchella_sp._Mes-19_[QQL94629.1]   | 118     | 3.78e-58  | WNCGLKTLQG <b>SL</b> PGDSCDVGLILVEV <b>HEFLVFATIANQ</b> <b>IMP</b> FHTLT <b>PYSIRCAAKAAQNS</b> RLLTEAAHTL                           |
| Morchella_sp._Mes-20_[AVI61143.1]   | 118     | 1.10e-54  | WNCGLKTLQG <b>SL</b> PEDSCDVRLILVEV <b>HEFLAFATIANQ</b> <b>IMP</b> FHTLT <b>PYSIRCAAKAAQNS</b> RLLTEAAHTL                           |
| Morchella_purpurascens_[QQL94643.1] | 118     | 3.56e-54  | WDRNLKALQD <b>SL</b> PEYSEDVGLILAEV <b>HEFLAFATVANQ</b> <b>IMP</b> FDLTSS <b>IKCAAIAAKNS</b> GSPIEDSHAI                             |
| Morchella_importuna_[AVI60817.1]    | 118     | 1.24e-53  | WDHSLKTLQD <b>SL</b> PEHSEDVGLILAEV <b>HEFLAFATVANQ</b> <b>IMP</b> FDLTSS <b>IKCAAIAAKNS</b> GSIEDSHAI                              |
| Morchella_sextelata_[QQL94615.1]    | 118     | 5.70e-52  | WDHSLKALQD <b>SL</b> PEYSEDVGLILAEV <b>HEFLGFATVANQ</b> <b>IMP</b> FDLTSS <b>IKRAATAANDS</b> GSIEDSHAI                              |
| V_bohemica_No._21124                | 115     | 9.02e-49  | QWKQDVGA <b>VQ</b> <b>AS</b> PFTGS <b>DIG</b> IVLADV <b>HEFLVFSTLTNR</b> <b>IMP</b> FHTLT <b>ESSIKRAVQIAKIS</b> EFLADASHSV          |
| V_bohemica_No._20020                | 115     | 9.02e-49  | QWKQDVGA <b>VQ</b> <b>AS</b> PFTGS <b>DIG</b> IVLADV <b>HEFLVFSTLTNR</b> <b>IMP</b> FHTLT <b>ESSIKRAVQIAKIS</b> EFLADASHSV          |
| V_bohemica_No._21108                | 115     | 1.60e-48  | QWKQDVGV <b>VQ</b> <b>TS</b> PFTGS <b>DIG</b> IVLADV <b>HEFLGFSTLTNR</b> <b>IMP</b> FHTLT <b>ESSIKRAVQIAKIS</b> EFLADASHV           |
| V_conica_No._21110                  | 117     | 2.12e-48  | WKYDVEAV <b>QA</b> <b>SS</b> PGSS <b>DDIG</b> TVLAEV <b>HEFLVFATLTNR</b> <b>IMP</b> FHILTEFS <b>IKH</b> AVQ <b>VAKIS</b> EFLTEASNTI |
| Morchella_rufobrunnea_[QQL94651.1]  | 118     | 8.59e-48  | WNCRLKALQD <b>S</b> PENSS <b>DVGLVLAEV</b> <b>HEFLVFATIANQ</b> <b>V</b> TSHTLT <b>YYSIRLAABAAKGS</b> IFTEATHTI                      |

Motif 3

| Name ?                              | Start ? | p-value ? | Sites ?                                                                                                                                                                |
|-------------------------------------|---------|-----------|------------------------------------------------------------------------------------------------------------------------------------------------------------------------|
| Morchella_sp._Mes-19_[QQL94629.1]   | 232     | 2.66e-56  | YNYRGSH <b>TL</b> Y <b>TK</b> IRRN <b>D</b> IST <b>P</b> IPFEKLV <b>TWFTNARRRI</b> <b>IK</b> NQAI <b>R</b> PGLKA <b>IVDEALSSK</b> RSFKTDI <b>Y</b> IQ                  |
| Morchella_sp._Mes-20_[AVI61143.1]   | 232     | 1.58e-55  | YNYRGSHALY <b>TK</b> IRRN <b>E</b> IST <b>P</b> IPFEKLV <b>TWFTNARRRI</b> <b>IK</b> NQAI <b>R</b> PGLKA <b>IVDEALSSK</b> RSFKTDI <b>H</b> IQ                           |
| Morchella_crassipes_[AVI60838.1]    | 232     | 1.34e-54  | YNYRGSHALY <b>TK</b> IRRN <b>D</b> IST <b>P</b> IPFEKLV <b>TWFTNARRRI</b> <b>IR</b> RGQAI <b>R</b> PGLKA <b>IVDEALSSK</b> RSFKTDI <b>H</b> IQ                          |
| Morchella_importuna_[AVI60817.1]    | 232     | 4.97e-54  | YNCYKSYASC <b>TG</b> INQNT <b>I</b> STM <b>IP</b> FFENLV <b>TWFTNARRRI</b> <b>IG</b> GDQS <b>I</b> SPGLKS <b>IVNGALSSK</b> PLKIDHHVQ <b>H</b>                          |
| Morchella_sp._Mes-6_[QQL94636.1]    | 234     | 3.63e-53  | YNYRGSHALY <b>TK</b> IRRN <b>D</b> IST <b>P</b> IPFFENLV <b>TWFTNARRRI</b> <b>IK</b> NQAI <b>R</b> PSLKA <b>IVDEALSSK</b> RSFKTDI <b>H</b> IQ                          |
| Morchella_sextelata_[QQL94615.1]    | 234     | 6.09e-52  | CYKSHAPCTV <b>NE</b> INQNT <b>I</b> STM <b>IP</b> FFENLV <b>TWFTNARRRI</b> <b>IG</b> GNQT <b>I</b> SPGLS <b>IVNGALSSK</b> SLKIDHHVQ <b>D</b>                           |
| V_bohemica_No._21108                | 231     | 1.95e-45  | NHELMS <b>MTTE</b> <b>KE</b> IRQ <b>EARL</b> FVIPFD <b>HL</b> LTWF <b>INARRRI</b> <b>IL</b> VAGQT <b>IS</b> PALKVV <b>VN</b> LITSD KKPPPSHV <b>PM</b>                  |
| V_bohemica_No._21124                | 231     | 2.64e-45  | NHELMS <b>SAAE</b> <b>KQ</b> IRQ <b>EARL</b> FVIPFD <b>HL</b> LTWF <b>INARRRI</b> <b>IL</b> VAGQT <b>IS</b> PALKVV <b>VN</b> LITSD KKPPPSY <b>PM</b>                   |
| V_bohemica_No._20020                | 231     | 2.64e-45  | NHELMS <b>SAAE</b> <b>KQ</b> IRQ <b>EARL</b> FVIPFD <b>HL</b> LTWF <b>INARRRI</b> <b>IL</b> VAGQT <b>IS</b> PALKVV <b>VN</b> LITSD KKPPPSY <b>PM</b>                   |
| Morchella_purpurascens_[QQL94643.1] | 230     | 1.72e-44  | SWYNCYK <b>SYT</b> <b>SCT</b> VNN <b>TIST</b> VI <b>R</b> FENLV <b>TWFTNARRRI</b> <b>IG</b> GDQT <b>IS</b> PGLKS <b>IVNEALSKP</b> SKIDCHVQ <b>DK</b>                   |
| Morchella_rufobrunnea_[QQL94651.1]  | 233     | 2.08e-43  | HRKDHAS <b>RIF</b> <b>NDF</b> HQ <b>NDK</b> STQ <b>IP</b> FFEN <b>LM</b> TW <b>FCNGRRRI</b> <b>I</b> TCGQT <b>IN</b> FLKAI <b>ID</b> GA <b>VSSK</b> IPSKIETRG <b>D</b> |

Motif 4

| Name ?                              | Start ? | p-value ? | Sites ?                                                                                                                                                                                                                              |
|-------------------------------------|---------|-----------|--------------------------------------------------------------------------------------------------------------------------------------------------------------------------------------------------------------------------------------|
| Morchella_sp._Mes-6_[QQL94636.1]    | 425     | 1.40e-59  | VLLATRE <b>FNE</b> <b>TY</b> FEWQ <b>N</b> SR <b>S</b> DL <b>F</b> EAI <b>F</b> DV <b>FP</b> NP <b>N</b> ITE <b>EE</b> YLSK <b>IT</b> GM <b>VN</b> Q <b>IN</b> TW <b>CE</b> KS <b>FNR</b>                                            |
| Morchella_sp._Mes-20_[AVI61143.1]   | 423     | 1.40e-59  | VLLGTRE <b>SNE</b> <b>TY</b> FEWQ <b>N</b> SR <b>S</b> DL <b>F</b> EAI <b>F</b> DV <b>FP</b> NP <b>N</b> ITE <b>EE</b> YLSK <b>IT</b> GM <b>VN</b> Q <b>IN</b> TW <b>CE</b> KS <b>FNH</b>                                            |
| Morchella_sp._Mes-19_[QQL94629.1]   | 423     | 9.79e-57  | VLLATRE <b>PNE</b> <b>TY</b> FEWQ <b>N</b> SR <b>S</b> DL <b>F</b> EAI <b>F</b> DV <b>FP</b> NP <b>N</b> ITE <b>EE</b> YLSK <b>IT</b> GIN <b>VN</b> Q <b>IN</b> TW <b>CE</b> KS <b>FNH</b>                                           |
| Morchella_purpurascens_[QQL94643.1] | 417     | 8.69e-56  | ILLATRG <b>PNQ</b> <b>NY</b> FEWK <b>R</b> SR <b>S</b> ELLE <b>AI</b> FE <b>IF</b> PD <b>PN</b> MVE <b>EE</b> YLSN <b>VT</b> GM <b>N</b> INQ <b>IN</b> TW <b>CK</b> RS <b>LDP</b> NPY <b>TRI</b> H                                   |
| Morchella_sextelata_[QQL94615.1]    | 422     | 2.58e-54  | ILLATRG <b>ANQ</b> <b>N</b> FEWK <b>R</b> SR <b>S</b> ELLE <b>TIFE</b> TF <b>PD</b> PN <b>MI</b> EE <b>Y</b> LSN <b>VT</b> GM <b>N</b> INQ <b>IN</b> TW <b>CK</b> RS <b>LDP</b> QSY <b>LY</b> TL                                     |
| Morchella_importuna_[AVI60817.1]    | 420     | 6.64e-51  | ILLATRG <b>LNQ</b> <b>D</b> FERK <b>R</b> SR <b>S</b> ELLE <b>TIFE</b> IF <b>PD</b> PN <b>LM</b> EE <b>Y</b> LSN <b>VT</b> GM <b>N</b> INQ <b>IN</b> TW <b>CK</b> RS <b>PDP</b> QSY <b>LY</b> TL                                     |
| V_bohemica_No._21108                | 379     | 3.53e-47  | GENVVC <b>NRPL</b> <b>G</b> APT <b>NN</b> P <b>IR</b> SD <b>LL</b> EAV <b>FE</b> IC <b>ND</b> PN <b>ILE</b> EE <b>Y</b> LS <b>IT</b> GLSV <b>TQ</b> V <b>HC</b> W <b>FLY</b> LK <b>RHY</b> LSQ <b>PT</b> MA                          |
| V_bohemica_No._21124                | 434     | 3.53e-47  | GEKIVC <b>NRPL</b> <b>G</b> APT <b>NN</b> P <b>IR</b> SD <b>LL</b> EAV <b>FE</b> IC <b>ND</b> PN <b>ILE</b> EE <b>Y</b> LS <b>IT</b> GLSV <b>TQ</b> V <b>HC</b> W <b>FLY</b> LK <b>RHY</b> LSQ <b>PT</b> MV                          |
| Morchella_rufobrunnea_[QQL94651.1]  | 423     | 5.01e-46  | VLLATK <b>KPNK</b> <b>TY</b> LE <b>CQ</b> N <b>P</b> WS <b>D</b> LL <b>E</b> K <b>I</b> FE <b>V</b> FP <b>D</b> NT <b>AE</b> EE <b>Y</b> MS <b>Y</b> AT <b>GM</b> NINQ <b>IN</b> T <b>S</b> CK <b>GS</b> <b>IN</b> LNS <b>VN</b> CLY |
| V_bohemica_No._20020                | 434     | 1.08e-45  | GEKIVC <b>NRPL</b> <b>G</b> APT <b>NN</b> P <b>IR</b> SD <b>LL</b> EAV <b>FE</b> IC <b>ND</b> PN <b>ILE</b> EE <b>Y</b> LS <b>IT</b> GLSV <b>TQ</b> V <b>HC</b> W <b>LV</b> LY <b>KRHY</b> LSQ <b>PT</b> MT                          |

Motif 5

| Name ?                              | Start ? | p-value ? | Sites ?                                                                                                                                                                                                                                                         |
|-------------------------------------|---------|-----------|-----------------------------------------------------------------------------------------------------------------------------------------------------------------------------------------------------------------------------------------------------------------|
| Morchella_sp._Mes-6_[QQL94636.1]    | 342     | 8.58e-60  | NFVIN <b>N</b> FGSG <b>PP</b> IL <b>PT</b> FL <b>VD</b> NN <b>MD</b> K <b>V</b> TQ <b>GCQ</b> <b>LL</b> KS <b>I</b> Y <b>SL</b> F <b>N</b> E <b>I</b> SS <b>AC</b> LD <b>IF</b> Q <b>RA</b> Y <b>W</b> LD <b>E</b> <b>RN</b> RCSY <b>TL</b> GA                  |
| Morchella_importuna_[AVI60817.1]    | 338     | 6.38e-57  | HIIIN <b>R</b> FD <b>IE</b> <b>PP</b> IN <b>PM</b> FF <b>AN</b> NS <b>AD</b> KL <b>TQ</b> GC <b>Q</b> <b>LL</b> KS <b>I</b> Y <b>SL</b> F <b>N</b> E <b>I</b> SS <b>AC</b> LD <b>IF</b> Q <b>RA</b> H <b>W</b> LN <b>K</b> <b>RR</b> YD <b>Y</b> AL <b>K</b> AK |
| Morchella_sp._Mes-20_[AVI61143.1]   | 340     | 2.62e-55  | NLVINN <b>F</b> GSG <b>PP</b> IL <b>PT</b> LL <b>VD</b> NN <b>MD</b> K <b>V</b> TQ <b>GCQ</b> <b>LL</b> KS <b>I</b> Y <b>SL</b> F <b>N</b> E <b>I</b> SS <b>AC</b> LD <b>IF</b> Q <b>RA</b> Y <b>W</b> LD <b>E</b> <b>RN</b> RY <b>S</b> Y <b>TL</b> GA         |
| Morchella_sextelata_[QQL94615.1]    | 340     | 3.69e-54  | HIIIN <b>H</b> FD <b>IE</b> <b>PP</b> IN <b>LF</b> FF <b>VN</b> NS <b>AD</b> KL <b>TQ</b> GC <b>L</b> <b>LL</b> KS <b>I</b> Y <b>N</b> LF <b>N</b> E <b>I</b> SS <b>AC</b> LD <b>IF</b> Q <b>RA</b> H <b>W</b> LN <b>K</b> <b>RR</b> YD <b>Y</b> AL <b>K</b> AK |
| Morchella_purpurascens_[QQL94643.1] | 335     | 4.76e-54  | HIIIN <b>H</b> FN <b>IE</b> <b>PR</b> IN <b>PM</b> FF <b>VN</b> IT <b>TD</b> KL <b>TQ</b> GC <b>Q</b> <b>LL</b> KS <b>I</b> Y <b>N</b> LF <b>N</b> E <b>I</b> SS <b>AC</b> LD <b>IF</b> Q <b>RA</b> H <b>W</b> LN <b>K</b> <b>RR</b> YD <b>Y</b> AL <b>K</b> AK |
| Morchella_sp._Mes-19_[QQL94629.1]   | 340     | 7.91e-54  | NFVIN <b>N</b> FGSG <b>PP</b> IL <b>PT</b> FL <b>VD</b> NN <b>ID</b> K <b>V</b> TQ <b>GCQ</b> <b>R</b> LKS <b>I</b> Y <b>SL</b> F <b>N</b> E <b>I</b> SS <b>AC</b> LD <b>IF</b> Q <b>RA</b> Y <b>W</b> LD <b>E</b> <b>RN</b> RY <b>S</b> Y <b>TL</b> GA         |
| Morchella_rufobrunnea_[QQL94651.1]  | 340     | 3.25e-46  | PSHPIT <b>NISS</b> <b>RD</b> IP <b>LV</b> FP <b>VN</b> NS <b>MD</b> K <b>F</b> A <b>Q</b> GC <b>Q</b> Y <b>LL</b> KS <b>I</b> Y <b>N</b> LF <b>N</b> EV <b>SS</b> AC <b>LD</b> IL <b>Q</b> RA <b>H</b> W <b>LD</b> A <b>KN</b> KQ <b>Y</b> HT <b>S</b> KA       |
| V_bohemica_No._21124                | 338     | 5.24e-42  | AVDPPL <b>PESR</b> <b>SP</b> IS <b>FD</b> FL <b>VD</b> LE <b>ADR</b> ST <b>Q</b> IA <b>Q</b> SL <b>L</b> Q <b>K</b> IY <b>RL</b> FNT <b>TI</b> Y <b>R</b> CL <b>Q</b> VT <b>Q</b> GA <b>H</b> W <b>LS</b> M <b>RE</b> Q <b>Y</b> EY <b>AV</b> RA                |
| V_bohemica_No._20020                | 338     | 5.24e-42  | AVDPPL <b>PESR</b> <b>SP</b> IS <b>FD</b> FL <b>VD</b> LE <b>ADR</b> ST <b>Q</b> IA <b>Q</b> SL <b>L</b> Q <b>K</b> IY <b>RL</b> FNT <b>TI</b> Y <b>R</b> CL <b>Q</b> VT <b>Q</b> GA <b>H</b> W <b>LS</b> M <b>RE</b> Q <b>Y</b> EY <b>AV</b> RA                |
| V_conica_No._21110                  | 336     | 7.41e-42  | TVDPPL <b>PRNR</b> <b>SP</b> IFF <b>N</b> LF <b>VN</b> MG <b>AD</b> GV <b>TQ</b> ET <b>Q</b> N <b>LL</b> KK <b>I</b> Y <b>N</b> LF <b>N</b> MT <b>AY</b> R <b>C</b> LE <b>VI</b> Q <b>RA</b> H <b>W</b> V <b>N</b> M <b>E</b> Q <b>Y</b> EY <b>AV</b> RA        |



# Motif 6

| Name ?                              | Start ? | p-value ? | Sites ?                                                 |
|-------------------------------------|---------|-----------|---------------------------------------------------------|
| Morchella_sp._Mes-19_[QQL94629.1]   | 13      | 1.23e-36  | QPYLPYKDH F ILNDQRREAILRLGRVLIQTKNDLTFFPRTP YSFKIRKAI I |
| Morchella_crassipes_[AVI60838.1]    | 13      | 1.23e-36  | QPYLPYKDH F ILNDQRREAILRLGRVLIQTKNDLTFFPRTP YSFKIRKAI I |
| Morchella_sp._Mes-6_[QQL94636.1]    | 13      | 1.23e-36  | QPYLSYEDH F ILNDQRREAILRLGRVLIQTKNDLTFFPRTP YSFKIRKAI R |
| Morchella_sp._Mes-20_[AVI61143.1]   | 13      | 1.23e-36  | QPYLSYKDH F ILNDQRREAILRLGRVLIQTKNDLTFFPRTP YSFKIRKAI I |
| Morchella_sextelata_[QQL94615.1]    | 13      | 3.74e-34  | QPYLSYDDH F LLNHERREAILRLGQTLIQTKNDLAFFFRTP YNPKIRKAMV  |
| Morchella_purpurascens_[QQL94643.1] | 13      | 6.94e-33  | QPYLSYHDF LLDHERREAILRLGQTLIQMKNDLVFFPRTP YNPKIRKVMV    |
| Morchella_importuna_[AVI60817.1]    | 13      | 1.26e-32  | QPYLSYDDH F LLNHERREAILRLGQTLIQTKNDLTFFPRTA YNLKIRKAMV  |
| V._bohemica_No._21108               | 11      | 1.83e-31  | MTEYLAYHDN RRDDPRRESLLRLGHALIKVKNDLAFFFSTR LDPNIRKVLV   |
| V._bohemica_No._21124               | 11      | 1.83e-31  | MTEYLAYHDN RRDDPRRESLLRLGHALIKVKNDLAFFFSTR LDPNIRKVLV   |
| V._bohemica_No._20020               | 11      | 1.83e-31  | MTEYLAYHDN RRDDPRRESLLRLGHALIKVKNDLAFFFSTR LDPNIRKVLV   |
| Morchella_rufobrunnea_[QQL94651.1]  | 13      | 4.59e-31  | QTYLSYKDH F ILNNERREAVLRILGRILIQTKNELAFFFRTP YNSKIRRVMI |
| V._conica_No._21110                 | 12      | 3.37e-30  | AEAYLVCHDN RRDDSRREALRLGHALIKVKNDLAFFFPSKR LDSQIRDVLV   |

# Motif 7

| Name ?                              | Start ? | p-value ? | Sites ?                                                          |
|-------------------------------------|---------|-----------|------------------------------------------------------------------|
| Morchella_sp._Mes-20_[AVI61143.1]   | 289     | 2.07e-48  | SSKRSFKTDI HIQTRGSNGDDDPWEIPLSRMIAEFLDELGDAPHELDPPS NLVINNFSGS   |
| Morchella_sp._Mes-6_[QQL94636.1]    | 291     | 7.69e-46  | SSKRSFKTDI HIQTRGSNGDDDPWEIPLSRMIAEFLDELGDAPHELDPPS NFINNFSGS    |
| Morchella_crassipes_[AVI60838.1]    | 289     | 4.83e-45  | SSKRSFKTDI HIQARGSNNGDDDPWEIPLSRMIAEFLDELGDAPHELDPPS NFINNFSGS   |
| Morchella_sextelata_[QQL94615.1]    | 290     | 5.60e-45  | LSSKSLKIDH HVQDKSDNGDGDPEWEIPLSRMIAEFLDELGDAPHELDPPS I IINHFDIEP |
| Morchella_sp._Mes-19_[QQL94629.1]   | 289     | 2.54e-43  | SSKRSFKTDI YIQARGSNNGDDDPWEIPLSRMIAEFLDELGDAPHELDPPS NFINNFSGS   |
| Morchella_importuna_[AVI60817.1]    | 288     | 2.89e-43  | LSSKPLKIDH HVQDKSDNGDGDPEWEIPLSRMIAEFLDELGDAPHELDPPS I IINRFDIEP |
| Morchella_purpurascens_[QQL94643.1] | 285     | 3.10e-41  | ALSKPSKIDC HVQDKSDNGDGDPEWEIPLSRMIAEFLDELGDAPHELDPPS I IINHFNIEP |
| Morchella_rufobrunnea_[QQL94651.1]  | 291     | 3.15e-40  | SKIPSKIETR GDDTDGNDGDPEWEIPLSRMIAEFLDELGDAPHELDPPS HPITNISSRD    |
| V._bohemica_No._21124               | 285     | 7.66e-35  | NLITSDKKPP PSYVPMDDSNYEFHYNIPLTQLIAEFLDELGEVPSKLLPLK HLAVDPLPE   |
| V._bohemica_No._20020               | 285     | 7.66e-35  | NLITSDKKPP PSYVPMDDSNYEFHYNIPLTQLIAEFLDELGEVPSKLLPLK HLAVDPLPE   |
| V._bohemica_No._21108               | 285     | 8.35e-35  | NLITSDKKPP PSYVPMDDSNYEFHYNIPLTQLIAEFLDELGEVPSKLLPLK HLAVDPLPE   |
| V._conica_No._21110                 | 284     | 1.14e-26  | ASKVPFKHSA QKLTMPKNKGDEPHYDIPLTELILELLGELGEMPKLILK H STVDPLPRN   |

# Motif 8

| Name ?                              | Start ? | p-value ? | Sites ?                                             |
|-------------------------------------|---------|-----------|-----------------------------------------------------|
| Morchella_crassipes_[AVI60838.1]    | 201     | 5.56e-32  | QVRRTSKTTR SRIISNAVSLPKVALNICSDWYNRGSNA LYTKIRRNDI  |
| Morchella_sp._Mes-20_[AVI61143.1]   | 201     | 5.56e-32  | QIRRTSKTTR SRIISNAVSLPKVALNICSDWYNRGSNA LYTKIRRNEI  |
| Morchella_importuna_[AVI60817.1]    | 201     | 7.76e-32  | QIQRTSNNGI NHVITNAVSLPQIAIVICSDWYNKYKSYA SCTGIHQNTI |
| Morchella_sp._Mes-19_[QQL94629.1]   | 201     | 2.77e-31  | QIRRMSTKTR SRIISNAVSLPKVALNICSDWYNRGSHT LYTKIRRNDI  |
| Morchella_sextelata_[QQL94615.1]    | 201     | 2.48e-30  | QIQRTSNNGI NHVITDAVSLPQIAIVICSDWYNKYKSHA PCTVNEIHQN |
| Morchella_sp._Mes-6_[QQL94636.1]    | 203     | 1.53e-28  | RRTSKTTRSR IIMISNAVSLQKVALNICSDWYNRGSNA LYTKIRRNDI  |
| V._bohemica_No._21108               | 198     | 1.26e-26  | EALGASNTKD KYVVS DAVTSLQTTFIARDWYKNHLSM STEKEIRQE   |
| V._bohemica_No._21124               | 198     | 1.55e-26  | EALGTSNTKD KYVVS DAVTSLKTTTFIARDWYKNHLSM SAEKQIRQE  |
| V._bohemica_No._20020               | 198     | 1.55e-26  | EALGTSNTKD KYVVS DAVTSLKTTTFIARDWYKNHLSM SAEKQIRQE  |
| Morchella_rufobrunnea_[QQL94651.1]  | 200     | 6.03e-26  | IQIQRILMRR NYIISDPVSLPQIVLTLCSWYNHRKDH SRI FNDPHQN  |
| Morchella_purpurascens_[QQL94643.1] | 201     | 2.24e-25  | HIQRTSNNGI NHVITNVVPLPQIAISICSSWYNKYKSYT SCTVNNTIST |
| V._conica_No._21110                 | 198     | 4.93e-22  | ELDSASGPKN NRVVSSAIIPPQTVIHIAKDWYKSYKSSI SVAEKACCHS |

# Motif 9

| Name ?                              | Start ? | p-value ? | Sites ?                                              |
|-------------------------------------|---------|-----------|------------------------------------------------------|
| Morchella_sp._Mes-6_[QQL94636.1]    | 170     | 2.05e-33  | AAKAAQNSRL LTEAANTISILRAAFSIQNELQIRRTSKT TRSRIIMISN  |
| Morchella_sp._Mes-20_[AVI61143.1]   | 170     | 5.45e-32  | AAKAAQNSRL LTEAANTISILRAAFSIQNELQIRRTSKT TRSRIISNAV  |
| Morchella_sp._Mes-19_[QQL94629.1]   | 170     | 3.30e-31  | AAKAAQDSRL LTEAANTISILRAAFSIQNELQIRRMSTK TRSRIISNAV  |
| Morchella_crassipes_[AVI60838.1]    | 170     | 3.30e-31  | AAKAAQNSRL LTEAANTISILRAAFSIQNELQVRRTSKT TRSRIISNAV  |
| Morchella_sextelata_[QQL94615.1]    | 170     | 1.77e-29  | AATAANDSGS LIEDSHAISILQAAFTIQTGLQIRTSNS GINHVITDAV   |
| Morchella_importuna_[AVI60817.1]    | 170     | 1.98e-29  | AAIAAKDSGS LIEDSHAISILQAAFTIQTGLQIRTSNS GINHVITNAV   |
| V._bohemica_No._21124               | 167     | 7.68e-28  | AVQIAKHSEF LADASHSVSILQAAFSIQSGLEALGTSNT KDKYVVS DAV |
| V._bohemica_No._20020               | 167     | 7.68e-28  | AVQIAKHSEF LADASHSVSILQAAFSIQSGLEALGTSNT KDKYVVS DAV |
| V._bohemica_No._21108               | 167     | 2.62e-27  | AVQIAKHSEF LADASHTVSILQAAFSIQSGLEALGASNT KDKYVVS DAV |
| Morchella_purpurascens_[QQL94643.1] | 170     | 7.74e-26  | AAIAAKNSGS PIEDSHAISILQAAFTIQTALHIQRTSNS GINHVITNVV  |
| Morchella_rufobrunnea_[QQL94651.1]  | 170     | 3.37e-24  | AAEAAKGSIF TTEATNTISILRAAFVQNEIQIQRILMRR RNYIISDPVS  |
| V._conica_No._21110                 | 169     | 8.81e-21  | AVQVAKHSEF LTESANTISILAAALSQNELDSASGPKN NRVVSSAIIPP  |



# Motif 10

| Name ?                              | Start ? | p-value ? | Sites ?                                                              |
|-------------------------------------|---------|-----------|----------------------------------------------------------------------|
| Morchella_sp._Mes-19_[QQL94629.1]   | 393     | 3.91e-34  | RAYWLDERNR <b>YSYTLGAKRDM</b> YNCLRAISVLLAT <b>REPN</b> ETYFEWQNHS   |
| Morchella_purpurascens_[QQL94643.1] | 387     | 1.27e-32  | QRAHWLNKRR <b>YDYALKAKRD</b> IDDNCLRAITILLAT <b>RGPN</b> QNYFEWKRRHS |
| Morchella_importuna_[AVI60817.1]    | 390     | 5.42e-32  | QRAHWLNKRR <b>YDYALKAKRD</b> IDDNCLRAITILLAT <b>RGPN</b> QDHFERKRRHS |
| Morchella_sp._Mes-6_[QQL94636.1]    | 395     | 1.74e-31  | RAYWLDERNR <b>CSYTLGAKRDM</b> YNCLRAISVLLAT <b>REFN</b> ETYFEWQNHS   |
| Morchella_sextelata_[QQL94615.1]    | 392     | 1.74e-31  | QRAHWLNKRR <b>YDYALKAKRD</b> IDDNCLRAITILLAT <b>RGAN</b> QNHFEWKRRHS |
| Morchella_sp._Mes-20_[AVI61143.1]   | 393     | 2.52e-31  | RAYWLDERNR <b>YSYTLGAKRDM</b> YNCLRAISVLL <b>GTRESN</b> ETYFEWQNHS   |
| V._conica_No._21110                 | 389     | 8.00e-27  | RAHWVNMEKQ <b>YFYAVRAKKE</b> IDKNYLRAAGIALAT <b>RRLN</b> TVHFEEIIVC  |
| V._bohemica_No._21124               | 391     | 2.10e-26  | GAHWLSMREQ <b>YFYAVRATRE</b> IEKNYLRAVGTALAT <b>RRLN</b> PAYFGEKIVC  |
| V._bohemica_No._20020               | 391     | 2.10e-26  | GAHWLSMREQ <b>YFYAVRATRE</b> IEKNYLRAVGTALAT <b>RRLN</b> PAYFGEKIVC  |
| Morchella_rufobrunnea_[QQL94651.1]  | 393     | 4.59e-23  | RAHWLDAKNK <b>QYHTSKAKID</b> MDRSCLRAINVLLAT <b>KKPN</b> KTYLEQCQNH  |

# Motif 11

| Name ?                              | Start ? | p-value ? | Sites ?                                               |
|-------------------------------------|---------|-----------|-------------------------------------------------------|
| Morchella_sp._Mes-19_[QQL94629.1]   | 102     | 1.71e-18  | LALREVNIRL <b>ERDIEKWN</b> CGLK <b>TLQ</b> GSLPGDSCDV |
| Morchella_crassipes_[AVI60838.1]    | 102     | 1.71e-18  | LALREVNIRL <b>ERDIEKWN</b> CGLK <b>TLQ</b> SSLPEDSCDV |
| Morchella_sp._Mes-6_[QQL94636.1]    | 102     | 1.71e-18  | LALREVNIRL <b>ERDIEKWN</b> CGLK <b>TLQ</b> GSLPEDSCDV |
| Morchella_sp._Mes-20_[AVI61143.1]   | 102     | 1.71e-18  | LALREVNIRL <b>ERDIEKWN</b> CGLK <b>TLQ</b> GSLPEDSCDV |
| V._bohemica_No._21124               | 100     | 3.09e-15  | MALLEIQDVL <b>YTQLCQWKQ</b> DVGAVQ ASFPTGSDIG         |
| V._bohemica_No._20020               | 100     | 3.09e-15  | MALLEIQDVL <b>YTQLCQWKQ</b> DVGAVQ ASFPTGSDIG         |
| Morchella_sextelata_[QQL94615.1]    | 102     | 3.86e-15  | LALREVNIRL <b>EKDI</b> IKWDHSLK <b>ALQ</b> DSLPEYSEDV |
| Morchella_importuna_[AVI60817.1]    | 102     | 4.31e-15  | LALREVNIRL <b>EKDI</b> IKWDHSLK <b>TLQ</b> DSLPEHSEDV |
| Morchella_rufobrunnea_[QQL94651.1]  | 102     | 6.66e-15  | LALREVNIRL <b>ERDI</b> KRWNCRLK <b>ALQ</b> DSFPENSSDV |
| Morchella_purpurascens_[QQL94643.1] | 102     | 1.69e-14  | LALREVNIRL <b>EKDI</b> IKWDRNLK <b>ALQ</b> DSLPEYSEDV |
| V._bohemica_No._21108               | 100     | 1.69e-14  | MALLEIQNVL <b>YTQLCQWKQ</b> DVGAVQ TSFPTGSDIG         |
| V._conica_No._21110                 | 101     | 2.28e-12  | LALQEIQNRF <b>FTELDQWKY</b> DVEAVQ ASSPGGSDDI         |

# Motif 12

| Name ?                              | Start ? | p-value ? | Sites ?                                   |
|-------------------------------------|---------|-----------|-------------------------------------------|
| Morchella_sp._Mes-20_[AVI61143.1]   | 1       | 1.57e-15  | <b>MPQP</b> YLSY <b>KDH</b> FILNDQRREA    |
| Morchella_importuna_[AVI60817.1]    | 1       | 6.45e-15  | <b>MPQP</b> YLSY <b>DDH</b> FLLNHERREA    |
| Morchella_sp._Mes-19_[QQL94629.1]   | 1       | 8.04e-15  | <b>MPQP</b> YLPY <b>KDH</b> FILNDQRREA    |
| Morchella_crassipes_[AVI60838.1]    | 1       | 8.04e-15  | <b>MPQP</b> YLPY <b>KDH</b> FILNDQRREA    |
| Morchella_sp._Mes-6_[QQL94636.1]    | 1       | 9.45e-15  | <b>MPQP</b> YLSY <b>EDH</b> FILNDQRREA    |
| Morchella_sextelata_[QQL94615.1]    | 1       | 4.32e-14  | <b>MSQP</b> YLSY <b>DDH</b> FLLNHERREA    |
| Morchella_rufobrunnea_[QQL94651.1]  | 1       | 1.36e-13  | <b>MPQT</b> YLSY <b>KDH</b> FILNNERREA    |
| Morchella_purpurascens_[QQL94643.1] | 1       | 1.36e-13  | <b>MPQQ</b> YLSY <b>DDH</b> FLLDHERREA    |
| V._bohemica_No._21124               | 487     | 2.07e-10  | HCWFLYKRHY <b>LSQP</b> TMVDV <b>DE</b> I  |
| V._bohemica_No._20020               | 488     | 2.07e-10  | CWLVLVYKRHY <b>LSQP</b> TMVDV <b>DE</b> I |
| V._bohemica_No._21108               | 432     | 5.37e-10  | HCWFLYKRHY <b>LSQP</b> TMADV <b>DE</b> I  |
| V._conica_No._21110                 | 1       | 6.62e-9   | <b>MAEAY</b> LV <b>CHDN</b> RRDDSRREAL    |

# Motif 13

| Name ?                            | Start ? | p-value ? | Sites ?                                        |
|-----------------------------------|---------|-----------|------------------------------------------------|
| Morchella_sp._Mes-19_[QQL94629.1] | 332     | 4.85e-11  | PHELDPPSNF <b>VINN</b> F <b>GSG</b> PPILPTFLVD |
| Morchella_crassipes_[AVI60838.1]  | 332     | 4.85e-11  | PHELDPPSNF <b>VINN</b> F <b>GSG</b> PPILPTFLVD |
| Morchella_sp._Mes-6_[QQL94636.1]  | 334     | 4.85e-11  | PHELDPPSNF <b>VINN</b> F <b>GSG</b> PPILPTFLVD |
| Morchella_sp._Mes-20_[AVI61143.1] | 332     | 4.85e-11  | PHELDPPSNL <b>VINN</b> F <b>GSG</b> PPILPTLLVD |

# Motif 14

| Name ?                | Start ? | p-value ? | Sites ?                                             |
|-----------------------|---------|-----------|-----------------------------------------------------|
| V._bohemica_No._21124 | 422     | 1.86e-15  | ALATRRLNPA <b>YFGE</b> KIVCN <b>RNP</b> LGAPTNNNP I |
| V._bohemica_No._20020 | 422     | 1.86e-15  | ALATRRLNPA <b>YFGE</b> KIVCN <b>RNP</b> LGAPTNNNP I |
| V._bohemica_No._21108 | 367     | 1.40e-14  | ALATRRLNPA <b>YFGE</b> NVVCN <b>RNP</b> LGAPTNNNP I |



Motif 15

| Name ?                | Start ? | p-value ? | Sites ?                        |
|-----------------------|---------|-----------|--------------------------------|
| V._bohemica_No._21108 | 1       | 1.09e-11  | MTEYLAYH DNRRDDPRRE            |
| V._bohemica_No._21124 | 1       | 1.09e-11  | MTEYLAYH DNRRDDPRRE            |
| V._bohemica_No._20020 | 1       | 1.09e-11  | MTEYLAYH DNRRDDPRRE            |
| V._conica_No._21110   | 459     | 2.81e-8   | FEICNDPNML EEEYLAYV TGLSFFINAI |

Motif 16

| Name ?                | Start ? | p-value ? | Sites ?                          |
|-----------------------|---------|-----------|----------------------------------|
| V._bohemica_No._21108 | 328     | 5.95e-13  | PKSLLPLKHL AVDPPLPESR SPISFDFLVN |
| V._bohemica_No._21124 | 328     | 5.95e-13  | PKSLLPLKHL AVDPPLPESR SPISFDFLVD |
| V._bohemica_No._20020 | 328     | 5.95e-13  | PKSLLPLKHL AVDPPLPESR SPISFDFLVD |
| V._conica_No._21110   | 326     | 2.25e-10  | MPKLILLKHS TVDPPLPRNR SPIFFNLFVN |

Motif 17

| Name ?                            | Start ? | p-value ? | Sites ?                      |
|-----------------------------------|---------|-----------|------------------------------|
| Morchella_sp._Mes-19_[QQL94629.1] | 282     | 3.03e-8   | AIVDEALSSK RSFKTD IYIQARGSNG |
| Morchella_crassipes_[AVI60838.1]  | 282     | 3.03e-8   | AIVDEALSSK RSFKTD IHIQARGSNG |
| Morchella_sp._Mes-6_[QQL94636.1]  | 284     | 3.03e-8   | AIVDEALSSK RSFKTD IHIQTRGSNG |
| Morchella_sp._Mes-20_[AVI61143.1] | 282     | 3.03e-8   | AIVDEALSSK RSFKTD IHIQTRGSNG |
