# Supplementary material for: Structure of the Mating-Type Genes and Mating Systems of Verpa bohemica and Verpa conica (Ascomycota, Pezizomycotina)
Source: MDPI journal article supplement (doi:10.3390/jof9121202), 2023-12-15
Supplement: s1 [file s1]

The detailed sequence information of the *MAT1-1-11* protein motif.

## Motif 1

| Name  | Start  | p-value  | Sites  |
|--------------------------------------------------------------------------------------|-----------------------------------------------------------------------------------------|-------------------------------------------------------------------------------------------|-----------------------------------------------------------------------------------------|
| Morchella_purpurascens_[QQL94647]                                                    | 222                                                                                     | 2.01e-61                                                                                  | GPLATSLASE WYRNYKL MPADQEWRNSCRFELPPFETMLGWFENSRRRILSDIHSIRP GFKAIIDKQI                 |
| Morchella_sextelata_[QQL94614]                                                       | 222                                                                                     | 2.33e-61                                                                                  | GPLATSLATE WYRNYEL MPADGQEWRLNCRFELPSFETMLGWFENSRRRILSDIHSIRP GLKAIIDKQI                |
| Morchella_importuna_[AVI61142]                                                       | 222                                                                                     | 1.28e-60                                                                                  | GPLATSLASE WYRNYEL MPANEQEWRLNCRFELPSFETMFGWFENSRRRILSDIHSIRP GLKAIIDKQI                |
| Verpa_conica_No._21120                                                               | 251                                                                                     | 3.54e-55                                                                                  | SPITLSIARE WYKNYE INMANDEREWRKLCFFPLTFPDTMLDWFTKARCRINSDTAIRP AFKVIVDKAM                |
| Verpa_conica_No._21117                                                               | 231                                                                                     | 3.54e-55                                                                                  | SPITLSIARE WYKNYE INMANDEREWRKLCFFPLTFPDTMLDWFTKARCRINSDTAIRP AFKVIVDKAM                |

## Motif 2

| Name  | Start  | p-value  | Sites  |
|--------------------------------------------------------------------------------------|-----------------------------------------------------------------------------------------|-------------------------------------------------------------------------------------------|-----------------------------------------------------------------------------------------|
| Morchella_importuna_[AVI61142]                                                       | 126                                                                                     | 2.73e-60                                                                                  | EEKIQKLQHN YTEDIWVAIADLHEFLIFACFVNQIHRDDTLDEKTLYSARNHLADSPHPE AGIALADLRA                |
| Morchella_sextelata_[QQL94614]                                                       | 126                                                                                     | 1.31e-59                                                                                  | EKKIQKLQHN YTEDIWVAVADLHEFLIFACFVNQIHRDDTLDEATLYSAQNHLIDSPHPE AGIAFADLRA                |
| Morchella_purpurascens_[QQL94647]                                                    | 126                                                                                     | 6.27e-56                                                                                  | EKKVQKLQHN YTEDIWVAIADLHEFLIFAYFVNQIHRGDTLDEETLYRAQNHLADSSHPE AGIAFADLRA                |
| Verpa_conica_No._21120                                                               | 156                                                                                     | 1.22e-50                                                                                  | LKILQTSIFK GEENIRVAIAEAHEFLLFATFINQLHRDDFFDDDTLQCATSHLEDSPHVE AAHALSGLRV                |
| Verpa_conica_No._21117                                                               | 136                                                                                     | 1.22e-50                                                                                  | LKILQTSIFK GEENIRVAIAEAHEFLLFATFINQLHRDDFFDDDTLQCATSHLEDSPHVE AAHALSGLRV                |

## Motif 3

| Name  | Start  | p-value  | Sites  |
|--------------------------------------------------------------------------------------|-----------------------------------------------------------------------------------------|-------------------------------------------------------------------------------------------|-----------------------------------------------------------------------------------------|
| Morchella_sextelata_[QQL94614]                                                       | 366                                                                                     | 5.79e-62                                                                                  | CTIDGNMKQA QHIIGRIFEAFTGTADFQCMNVILRSRLGGYEEKVFAQKSEKEFNIRYLS AVGEFLGQMR                |
| Morchella_purpurascens_[QQL94647]                                                    | 366                                                                                     | 1.76e-58                                                                                  | CTIDGNMKHA QHTIGRIFEAFTGTADFQCMNVILRSNRLGGCEEKLFQAKSEKEFNIRYLS AIGEFGLQRR               |
| Morchella_importuna_[AVI61142]                                                       | 367                                                                                     | 3.64e-57                                                                                  | CTIDGNMKQI QHIIGRIFEAFTGTADFQCMNAILHSRLGGYEEKVFAQKSEKEFNIRYLS AVGEFLGQMR                |
| Verpa_conica_No._21120                                                               | 393                                                                                     | 1.32e-45                                                                                  | DSINPSIQEI QRLIKVIFESFATTAALSMKIIILRDHGLDEVQIEITSSQHSEREFNTRYLR YNVPVLNIYS              |
| Verpa_conica_No._21117                                                               | 373                                                                                     | 1.32e-45                                                                                  | DSINPSIQEI QRLIKVIFESFATTAALSMKIIILRDHGLDEVQIEITSSQHSEREFNTRYLR YNVPVLNIYS              |

## Motif 4

| Name  | Start  | p-value  | Sites  |
|--------------------------------------------------------------------------------------|-----------------------------------------------------------------------------------------|-------------------------------------------------------------------------------------------|-----------------------------------------------------------------------------------------|
| Morchella_purpurascens_[QQL94647]                                                    | 24                                                                                      | 5.75e-57                                                                                  | EATITPRKTT NRREAINQIRNVLCQVKNDLAYKPRAVPDAKIRDIAIFATRVLRFRRIKE LKRAIIDEKL                |
| Morchella_importuna_[AVI61142]                                                       | 24                                                                                      | 2.13e-56                                                                                  | EATITPRKIT SRREAINKIRNVLCQVKNELAYKPRAVPDAKVRDVAIFSTRVLRFRRIKE LKRDSIDERL                |
| Morchella_sextelata_[QQL94614]                                                       | 24                                                                                      | 2.75e-55                                                                                  | EATII PRKTT SRREAISQIRNVLCQVKNDLAYKPRAVPDAKVRDVVIFSTRVLRFRRIKE LKRASIDERL               |
| Verpa_conica_No._21120                                                               | 51                                                                                      | 3.01e-50                                                                                  | LLTFIVANVS NRRKAIDRVVETLSQIRNELAYKPGAITDAKIRDVLLFALRVVRGFRVKY LRIKNLDETL                |
| Verpa_conica_No._21117                                                               | 31                                                                                      | 3.01e-50                                                                                  | LLTFIVANVS NRRKAIDRVVETLSQIRNELAYKPGAITDAKIRDVLLFALRVVRGFRVKY LRIKNLDETL                |

## Motif 5

| Name  | Start  | p-value  | Sites  |
|----------------------------------------------------------------------------------------|-------------------------------------------------------------------------------------------|---------------------------------------------------------------------------------------------|-------------------------------------------------------------------------------------------|
| Morchella_purpurascens_[QQL94647]                                                      | 291                                                                                       | 1.93e-58                                                                                    | IRDDSVVTKL NKGISMDEKRGETEKLDTLLADMIHEVDRLGSELEMKAFTPPFPFPSRAP QNHSPIKLQC                  |
| Morchella_sextelata_[QQL94614]                                                         | 291                                                                                       | 1.99e-56                                                                                    | IRDDSVVTKL NKGISMDEKRGETEKLDTLLADMIHEVDKLGSQLMKAFTPPFPFPSCTP QNHSPIKLQY                   |
| Morchella_importuna_[AVI61142]                                                         | 291                                                                                       | 1.78e-53                                                                                    | IRDDSVVTKL NKGISMDEKRGETEKLDTLLADMIHEVDKLGSQLKMKAFTPFPFPSASCT PQNHSPIKLQ                  |
| Verpa_conica_No._21120                                                                 | 320                                                                                       | 6.08e-46                                                                                    | MKAKEVLAGF QKGQVKDDTRDIEPINDLLKALILEVEGGFSLVKIRPFPFPFPSRAP ENKSPINLEY                     |
| Verpa_conica_No._21117                                                                 | 300                                                                                       | 6.08e-46                                                                                    | MKAKEVLAGF QKGQVKDDTRDIEPINDLLKALILEVEGGFSLVKIRPFPFPFPSRAP ENKSPINLEY                     |

## Motif 6

| Name  | Start  | p-value  | Sites  |
|----------------------------------------------------------------------------------------|-------------------------------------------------------------------------------------------|---------------------------------------------------------------------------------------------|-------------------------------------------------------------------------------------------|
| Morchella_importuna_[AVI61142]                                                         | 76                                                                                        | 2.60e-56                                                                                    | LRRFRIKELK RDSIDERLDFHPADIYSLGHQVKSLLGAQSNLVRDLRYLEKKIQKLQHN YTEDIWVAIA                   |
| Morchella_sextelata_[QQL94614]                                                         | 76                                                                                        | 5.78e-55                                                                                    | LRRFRIKELK RASIDERLDFRPIADYISLGHQVKSLLGAQSNLVRDLGYLEKKIQKLQHN YTEDIWVAIA                  |
| Morchella_purpurascens_[QQL94647]                                                      | 76                                                                                        | 2.41e-51                                                                                    | LRRFRIKELK RAIIDEKLDFHPADIYSLGLQIKSLLGAQSILARDLGYLEKKVQKLQHN YTEDIWVAIA                   |
| Verpa_conica_No._21120                                                                 | 103                                                                                       | 2.33e-42                                                                                    | VRGFRVKYLR IKNLDETLDFYPLVNIHNLGRQIFSLFELQKKFTKSLRDVAIELKILQTS IFKGEENIRV                  |
| Verpa_conica_No._21117                                                                 | 83                                                                                        | 2.33e-42                                                                                    | VRGFRVKYLR IKNLDETLDFYPLVNIHNLGRQIFSLFELQKKFTKSLRDVAIELKILQTS IFKGEENIRV                  |

## Motif 7

| Name  | Start  | p-value  | Sites  |
|----------------------------------------------------------------------------------------|-------------------------------------------------------------------------------------------|---------------------------------------------------------------------------------------------|-------------------------------------------------------------------------------------------|
| Morchella_sextelata_[QQL94614]                                                         | 455                                                                                       | 7.68e-64                                                                                    | PETRDVLVRD RHHSQILTCIFDAFGSLSEAE E EYLLGITHLHMSLEEIH EWFQKHS AKLQ RDNPEK                  |
| Morchella_importuna_[AVI61142]                                                         | 456                                                                                       | 1.17e-63                                                                                    | PETRNLILRD RHHSQILTCIFDAFGSLSEAE E EYLLGITHLHMSLEEIH EWFQKHS AKFQ NDKLEK                  |
| Morchella_purpurascens_[QQL94647]                                                      | 455                                                                                       | 2.64e-62                                                                                    | SETRGLFLRD RNSQILTCIFDAFGSLSEAE E EYLLGVTHLHMSLEEIH EWFQKHS AKLQ SGNREK                   |

## Motif 8

| Name  | Start  | p-value  | Sites  |
|----------------------------------------------------------------------------------------|-------------------------------------------------------------------------------------------|---------------------------------------------------------------------------------------------|-------------------------------------------------------------------------------------------|
| Morchella_sextelata_[QQL94614]                                                         | 342                                                                                       | 2.60e-29                                                                                    | PQFPSPCTPQ NISPIKLQYWVSDTCTIDGNM KQAQHIIGRI                                               |
| Morchella_importuna_[AVI61142]                                                         | 343                                                                                       | 2.60e-29                                                                                    | SFPSPASCTPQ NISPIKLQYWVSDTCTIDGNM KQIQHIIGRI                                              |
| Morchella_purpurascens_[QQL94647]                                                      | 342                                                                                       | 3.80e-28                                                                                    | PPFPSPRAPQ NISPIKLQCVSDTCTIDGNM KHAQHTIGRI                                                |
| Verpa_conica_No._21120                                                                 | 371                                                                                       | 2.20e-19                                                                                    | PPFPSPRAPE NKSPINLEYRISDSINPSIQE IQRLIKVIFE                                               |
| Verpa_conica_No._21117                                                                 | 351                                                                                       | 2.20e-19                                                                                    | PPFPSPRAPE NKSPINLEYRISDSINPSIQE IQRLIKVIFE                                               |

## Motif 9

| Name  | Start  | p-value  | Sites  |
|----------------------------------------------------------------------------------------|-------------------------------------------------------------------------------------------|---------------------------------------------------------------------------------------------|-------------------------------------------------------------------------------------------|
| Morchella_sextelata_[QQL94614]                                                         | 176                                                                                       | 4.60e-33                                                                                    | NHLIDSPHPE AGIAFADLRAARQVEKELQKLSYGEGLPT VSKVIKLGPL                                       |
| Morchella_importuna_[AVI61142]                                                         | 176                                                                                       | 1.96e-32                                                                                    | NHLADSPHPE AGIALADLRAARQVEKEFKMNGEGLPT VSKVIKLGPL                                         |
| Morchella_purpurascens_[QQL94647]                                                      | 176                                                                                       | 2.03e-31                                                                                    | NHLADSSHPE AGIAFADLRAARQVEKELQKMSYDKGLPT VSGVIKFGPL                                       |
| Verpa_conica_No._21120                                                                 | 206                                                                                       | 1.27e-25                                                                                    | SHLEDSPHVE AAHALSGLRVALSVSKELEKKDCRENPTV SSPTKLSPIT                                       |
| Verpa_conica_No._21117                                                                 | 186                                                                                       | 1.64e-25                                                                                    | SHLEDSPHVE AAHALSGLRVALSVSKELEKKDCRETPTV SSPTKLSPIT                                       |

Motif 10

| Name ?                            | Start ? | p-value ? | Sites ?                                              |
|-----------------------------------|---------|-----------|------------------------------------------------------|
| Morchella_sextelata_[QQL94614]    | 420     | 2.93e-36  | NIRYLSAVGE FLGQMRFKVFEAINPDEFDSEELTPETR DIVLRDRHHS   |
| Morchella_importuna_[AVI61142]    | 421     | 1.22e-35  | NIRYLSAVGE FLGQMRFKQVFEAINPDEFSGSKELTPETR NLILRDRHHS |
| Morchella_purpurascens_[QQL94647] | 420     | 1.79e-30  | NIRYLSAIGE FLGQRRFKAFEAINPDELDKGLTSETR GLFLRDRHNS    |
