# Supplementary material for: Structure of the Mating-Type Genes and Mating Systems of Verpa bohemica and Verpa conica (Ascomycota, Pezizomycotina)
Source: MDPI journal article supplement (doi:10.3390/jof9121202), 2023-12-15
Supplement: s1 [file s1]

Consensus

1. *MAT1-2-1 V. bohemica* strain No. 20020 Gene05693  
2. *MAT1-2-1 V. bohemica* strain No. 20124 Gene05691  
3. *MAT1-2-1 V. bohemica* strain No. 21108 Gene05690  
4. *MAT1-2-1 V. conica* strain No. 21117 Gene05375  
5. *MAT1-2-1 V. conica* strain No. 21120 Gene05382

|   |                                                                                     |     |
|---|-------------------------------------------------------------------------------------|-----|
|   |    |     |
|   | MPSSXXPXQMLREAIGPINQRFGYINEQNALNKLAGFRIEYDPSFDFVGSDGYTFSVKVFTTSDPNKSLELGDVKNKPETY   |     |
| 1 | -----MLREAIGPINQRFGYINEQNALNKLAGFRIEYDPSFDFVGSDGYTFSVKVFTTSDPNKSLELGDVKNKPETY       | 71  |
| 2 | MPSSLDPFQMLREAIGPINQRFGYINEQNALNKLAGFRIEYDPSFDFVGSDGYTFSVKVFTTSDPNKSLELGDVKNKPETY   | 80  |
| 3 | MPSSLDPFQMLREAIGPINQRFGYINEQNALNKLAGFRIEYDPSFDFVGSDGYTFSVKVFTTSDPNKSLELGDVKNKPETY   | 80  |
| 4 | -----MLREAIWHINQRFSYINEQNALNKLAGFRIEYDPSDFIIGSDGNTFSVKVFTTPDPNKSLELGDISEPETY        | 71  |
| 5 | MPSSIQPAQMLREAIWHINQRFSYINEQNALNKLAGFRIEYDPSDFIIGSDGNTFSVKVFTTPDPNKSLELGDISEPETY    | 80  |
|   |    |     |
|   | TVLTKTGFI RNYPCIRTNEGALIFVHDPATTGADKIYEGYKKFIDPQ-----XXXFIIYRNAEM                   |     |
| 1 | TVLTKTGFI RNYPCIRTNEGALIFVHDPATTGADKIYEGYKKFIDPQ-----TSSFIIYRNAEM                   | 130 |
| 2 | TVLTKTGFI RNYPCIRTNEGALIFVHDPATTGADKIYEGYKKFIDPH-----FIIYRNAEM                      | 136 |
| 3 | TVLTKTGFI RNYPCIRTNEGALIFVHDPATTGADKIYEGYKKFIDPH-----FIIYRNAEM                      | 136 |
| 4 | TVVTKTGLIKDYPCVRTNEGALIFVHDPTVTGADKIYEGYKKFIDPQYMTQGVSR TVKKNVKQHVP R PMNAFIIYRTAEM | 151 |
| 5 | TVVTKTGLIKDYPCVRTNEGALIFVHDPTVTGADKIYEGYKKFIDPQYMTQGVSR TVKKNVKQHVP R PMNAFIIYRTAEM | 160 |
|   |    |     |
|   | ATVRQQYPGIGNNDVSRIIGQRWRELDLGRNHYKVLATRSAQEHQLRHPPGYKYTPRKAEDV VRRRKRSAMPSDLEHIRN   |     |
| 1 | ATVRQQYPGIGNNDVSRIIGQRWRELDLGRNHYKVLATRSAQEHQLRHPPGYKYTPRKAEDV VRRRKRSAMPSDLEHIRN   | 210 |
| 2 | ATVRQQYPGIGNNDVSRIIGQRWRELDLGRNHYKVLATRSAQEHQLRHPPGYKYTPRKAEDV VRRRKRSAMPSDLEHIRN   | 216 |
| 3 | ATVRQQYPGIGNNDVSRIIGQRWRELDLGRNHYKVLATRSAQEHQLRHPPGYKYTPRKAEDV VRRRKRSAMPSDLEHIRN   | 216 |
| 4 | VTVRQQYPGIGNNDVSRIIGQRWRELDSETRTHYKILATRSAQEHQLKHPGYKYTPRKAEDV VRRRKRS A IASDLGHIRN | 231 |
| 5 | VTVRQQYPGIGNNDVSRIIGQRWRELDSETRTHYKILATRSAQEHQLKHPGYKYTPRKAEDV VRRRKRS A IASDLGHIRN | 240 |
|   |  |     |
|   | PKIHRGSDPIETLPVPLHNLIPGYPDLDNLTNTWVQDPTPDHFNALMDGFDSALGLAAENNLQKX                   |     |
| 1 | PKIHRGSDPIETLPVPLHNLIPGYPDLDNLTNTWVQDPTPDHFNALMDGFDSALGLAAENNLQKN                   | 275 |
| 2 | PKIHRGSDPIETLPVPLHNLIPGYPDLDNLTNTWVQDPTPDHFNALMDGFDSALGLAAENNLQKN                   | 281 |
| 3 | PKIHRGSDPIETLPVPLHNLIPGYPDLDNLTNTWVQDPTPDHFNALMDGFDSALGLAAENNLQKK                   | 281 |
| 4 | PKIHRSDNIVETPPASLHDLIPGYPDLDLTNTWVQEPTPDHFNALMHGFD CALGLAAENNLQNI                   | 296 |
| 5 | PKIHRSDNIVETPPASLHDLIPGYPDLDLTNTWVQEPTPDHFNALMHGFD CALGLAAENNLQNI                   | 305 |
