# Supplementary material for: Structure of the Mating-Type Genes and Mating Systems of Verpa bohemica and Verpa conica (Ascomycota, Pezizomycotina)
Source: MDPI journal article supplement (doi:10.3390/jof9121202), 2023-12-15

Consensus

- 1. MATI-1-1 *V. bohemica* strain No. 20020 Gene05694
- 2. MATI-1-1 *V. bohemica* strain No. 20124 Gene05692
- 3. MATI-1-1 *V. bohemica* strain No. 21108 Gene05691
- 4. MATI-1-1 *V. conica* strain No. 21110 Gene05311

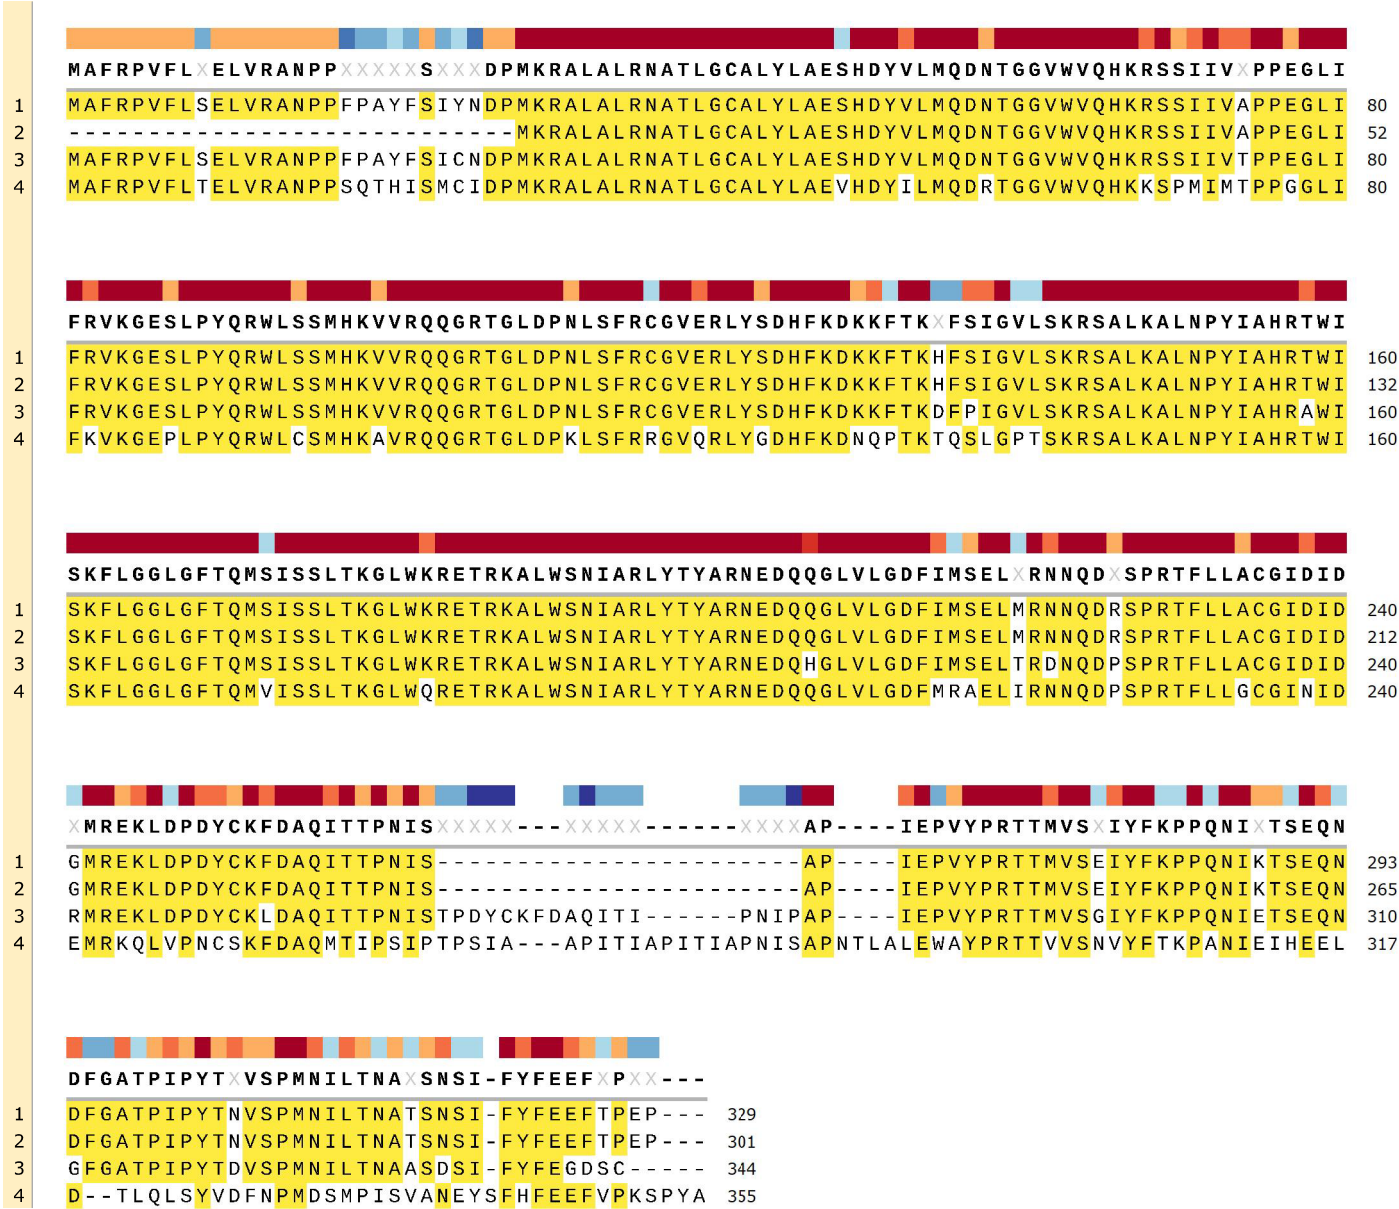

Supplement: s1 [file s1]
